# Supplementary material for: Hyperglycemia Promotes Endothelial Cell Senescence through AQR/PLAU Signaling Axis
Source: MDPI journal article supplement (doi:10.3390/ijms23052879), 2022-03-07
Supplement: s1 [file s1]

# Hyperglycemia Promotes Endothelial Cell Senescence through AQR/PLAU Signaling Axis

Yiqi Wan<sup>1</sup>, Zhirui Liu<sup>1</sup>, Andong Wu<sup>1</sup>, Abdul Haseeb Khan<sup>1</sup>, Ying Zhu<sup>1</sup>, Shuangjin Ding<sup>1</sup>, Xueer Li<sup>1</sup>, Ya Zhao<sup>1</sup>, Ximo Dai<sup>1</sup>, Jin Zhou<sup>1</sup>, Jiankun Liu<sup>1</sup>, Yuanyuan Li<sup>1</sup>, Xueting Gong<sup>1</sup>, Man Liu<sup>1</sup>, Xiao-Li Tian<sup>1\*</sup>

1. Aging and Vascular Diseases, Human Aging Research Institute (HARI) and School of Life Science, Nanchang University, and Jiangxi Key Laboratory of Human Aging, Nanchang, Jiangxi 330031, China

\*Correspondence: tianxiaoli@ncu.edu.cn

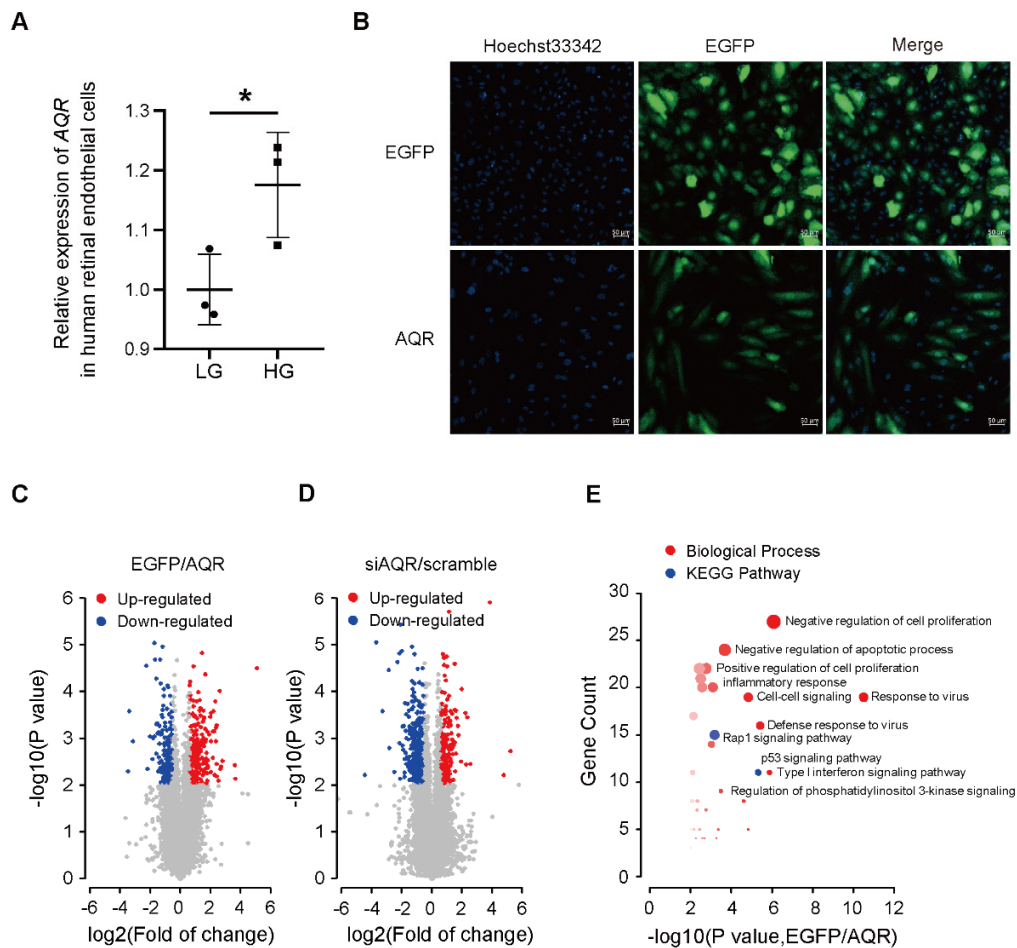

**Figure S1.** (A) Differential expression analysis of AQR in human retinal endothelial cells (hRECs) treated with low glucose (5 mM) and high glucose (25 mM) (LG: low glucose; HG: high glucose; GEO dataset: GSE117238, Platform: GPL21290, Probe id: ENST00000156471, n = 3 per group, data are presented as mean ± SEM, \* referred to p < 0.05; relative expression levels were calculated as fold change of high glucose group compared with the low glucose group). (B) Overexpression of AQR in HUVECs increased the nuclear area. HUVECs were pretreated with Adv-EGFP or Adv-AQR for 6h, cultured for another 24 h. Nuclei were counterstained with hoechst33342 (blue). The images were obtained by fluorescence microscope and overlaid. Scale bar=50μm (C)

Volcano plot of the RNA sequencing data of HUVECs overexpressed with AQR (Fold change > 1.5, p-value < 0.05). **(D)** Volcano plot of the RNA sequencing data of HUVECs by silencing of AQR (Fold change > 1.5, p-value < 0.05). **(E)** Enriched biological processes and pathways of the differentially expressed genes with overexpression of AQR (Fold change > 1.5, p-value < 0.05).

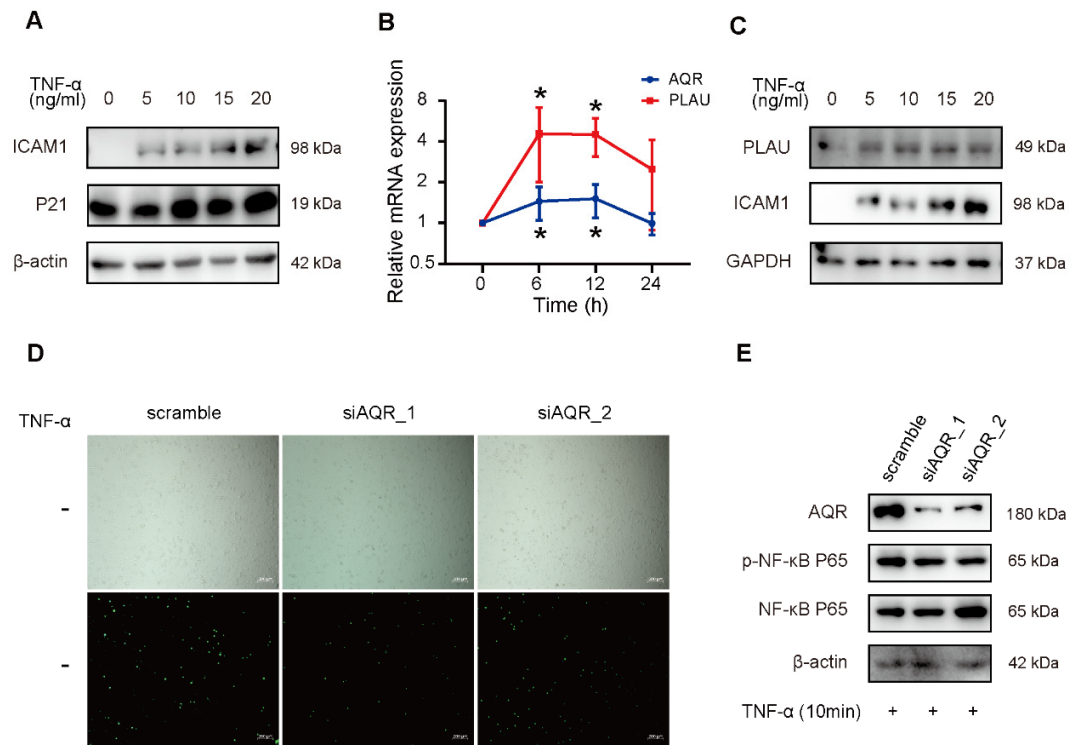

**Figure S2.** **(A)** The expression of P21 was upregulated in HUVECs treated with TNF- $\alpha$ , as determined by Western blot using  $\beta$ -actin as an internal control. Cells were cultured for 24 h, followed by stimulation with different concentrations of TNF- $\alpha$  (0 ng/ml, 5 ng/ml, 10 ng/ml, 15 ng/ml, 20 ng/ml) for 6 h. The correlation of time-course expression between AQR and PLAU in HUVECs. **(B)** qPCR analysis shows AQR and PLAU expression were both upregulated in response to 10 ng/ml TNF- $\alpha$  at different time points. **(C)** The expression of PLAU was also upregulated in response to TNF- $\alpha$ , as determined by Western blot using GAPDH as an internal control. **(D)** Cells were cultured for 24 h, followed by stimulation with different concentrations of TNF- $\alpha$  (0 ng/ml, 5 ng/ml, 10 ng/ml, 15 ng/ml, 20 ng/ml) for 6 h. Representative images show the effect of silencing AQR on THP-1 monocytes' adhesion to HUVECs. HUVECs were transfected with siAQR or scramble. 24 h later, the cells were incubated with THP-1 cells for another 1 h without treatment with TNF- $\alpha$ . The attached THP-1 cells were photographed and analyzed by fluorescence and light microscopy. Scale bar=200 $\mu$ m. **(E)** Effects of AQR silencing on the phosphorylation (Ser536) of P65 in HUVECs treated with TNF- $\alpha$  for a short time by western blot. Total P65 was used as an internal control.
