# Supplementary material for: Hyperglycemia Promotes Endothelial Cell Senescence through AQR/PLAU Signaling Axis
Source: Int J Mol Sci. 2022 Mar 7;23(5):2879. doi: 10.3390/ijms23052879 (PMC8911151; doi:10.3390/ijms23052879)
Supplement: Supplementary file 1 [file ijms-23-02879-s001.zip › Table S1.xlsx]

## Sheet: Sheet1
Primer name	Primer sequence (5′ → 3′)	Application
VCAM1-RT-F	GGACCACATCTACGCTGACA	Real-Time PCR
VCAM1-RT-R	TTGACTGTGATCGGCTTCCC	Real-Time PCR
ICAM1-RT-F	CAACCTCAGCCTCGCTATGG	Real-Time PCR
ICAM1-RT-R	CGGGGCAGGATGACTTTTGA	Real-Time PCR
p21-RT-F	TAGCAGCGGAACAAGGAG	Real-Time PCR
p21-RT-R	AAACGGGAACCAGGACAC	Real-Time PCR
B4GALT1-RT-F	ACCATAATGCGTACAGGTGTTT	Real-Time PCR
B4GALT1-RT-R	GGCGAGATATAGACATGCCTCT	Real-Time PCR
IFIT3-RT-F	AAAAGCCCAACAACCCAGAAT	Real-Time PCR
IFIT3-RT-R	CGTATTGGTTATCAGGACTCAGC	Real-Time PCR
PIK3CD-RT-F	AAGGAGGAGAATCAGAGCGTT	Real-Time PCR
PIK3CD-RT-R	GAAGAGCGGCTCATACTGGG	Real-Time PCR
FGF16-RT-F	TTCGCCCACCTAAAGGGGAT	Real-Time PCR
FGF16-RT-R	CTCCAGGATTCCGAAGCGG	Real-Time PCR
CCL14-RT-F	CACCCTCTTGGAGCTTCCCT	Real-Time PCR
CCL14-RT-R	GTACCAGGCTCCAGCAAAACT	Real-Time PCR
RARRES3-RT-F	AACAGTGCAGAGGTGAAACGG	Real-Time PCR
RARRES3-RT-R	GTTGGTACTCATGGTCCAAGC	Real-Time PCR
PLAU-RT-F	CTGTCACCTACGTGTGTGGAG	Real-Time PCR
PLAU-RT-R	TGAGCGACCCAGGTAGACG	Real-Time PCR
IL6-RT-F	TTAGAGTCTCAACCCCCAATAAATA	Real-Time PCR
IL6-RT-R	GAAGGCAACTGGACCGAAG	Real-Time PCR
GAPDH-RT-F	GAGTCAACGGATTTGGTCGT	Real-Time PCR
GAPDH-RT-R	GACAAGCTTCCCGTTCTCAG	Real-Time PCR
β-actin-RT-F	TGTCCACCTTCCAGCAGATGT	Real-Time PCR
β-actin-RT-R	CACCTTCACCGTTCCAGTTTT	Real-Time PCR
